# Supplementary material
Source: Springer Nature journal article supplement (https://www.springermedizin.de/resource/supplementary/12894_2011_183_MOESM2_ESM.pdf/9513138)

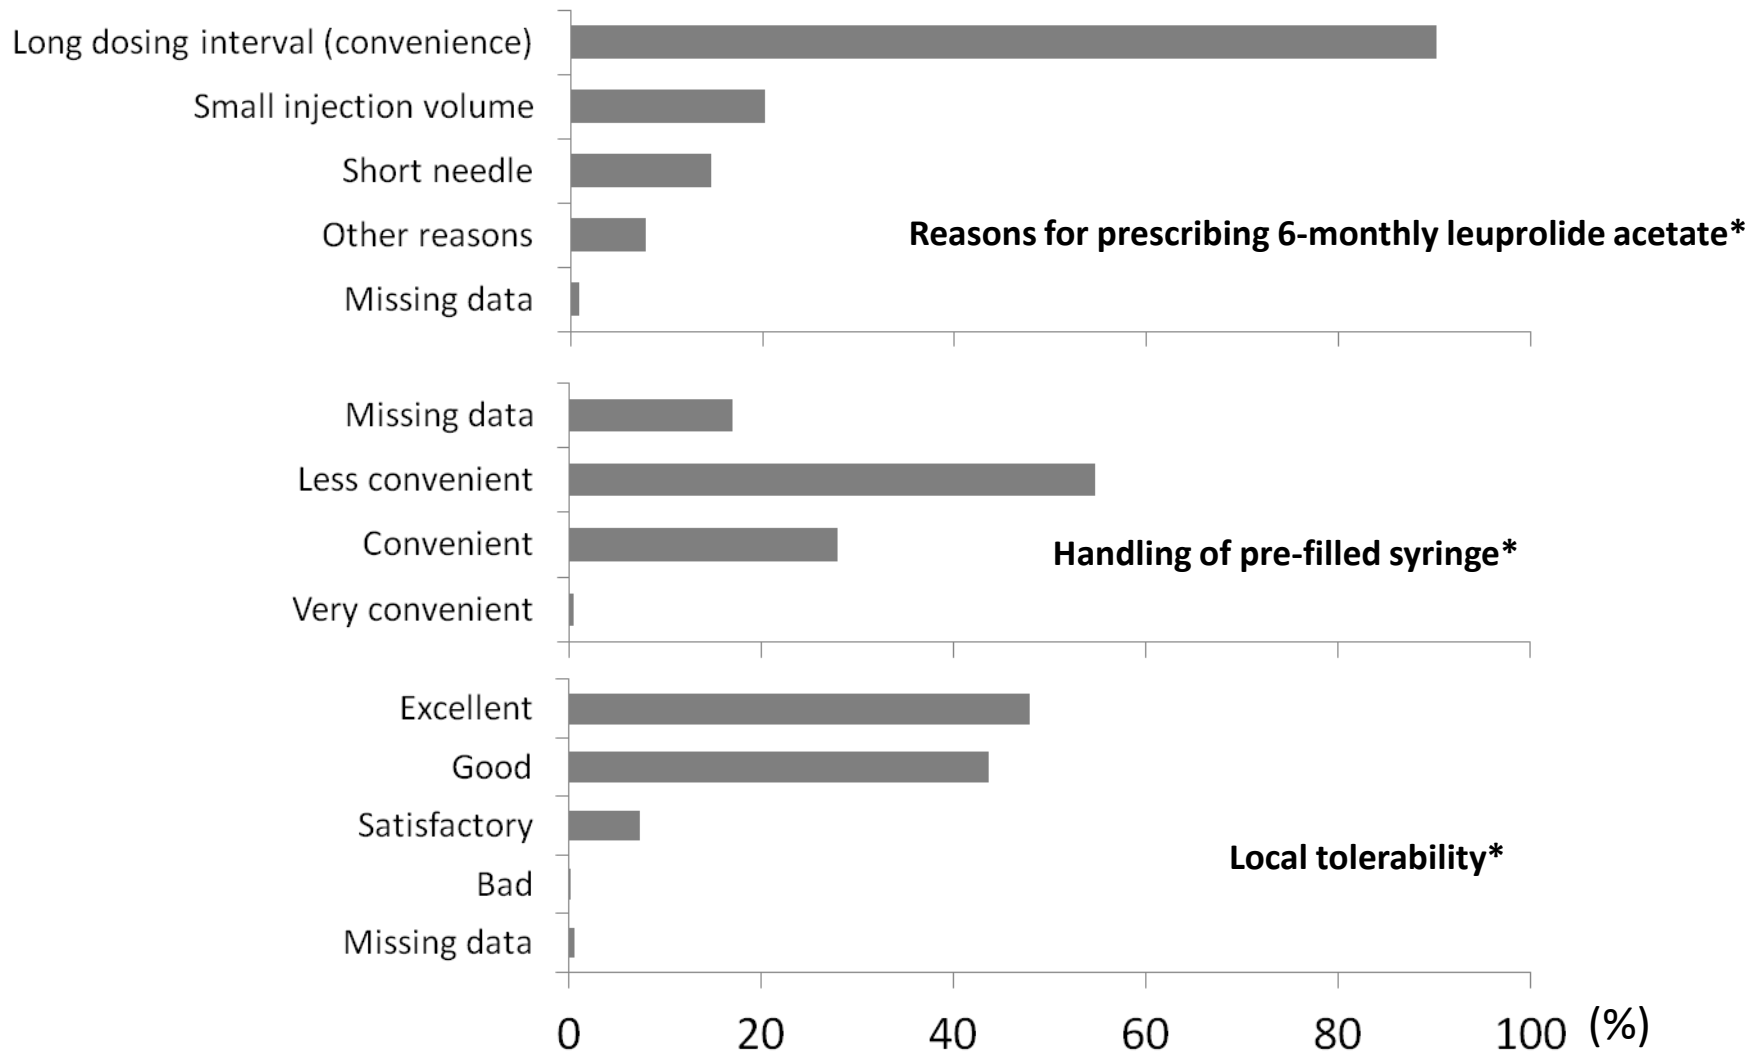

\*Percent of patients (n = 1273); Multiple namings were possible.

Supplement: MOESM2 [file 9513138]
